# Supplementary material
Source: MDPI journal article supplement (https://www.mdpi.com/2077-0472/9/2/29)
Supplement: s1 [file s1]

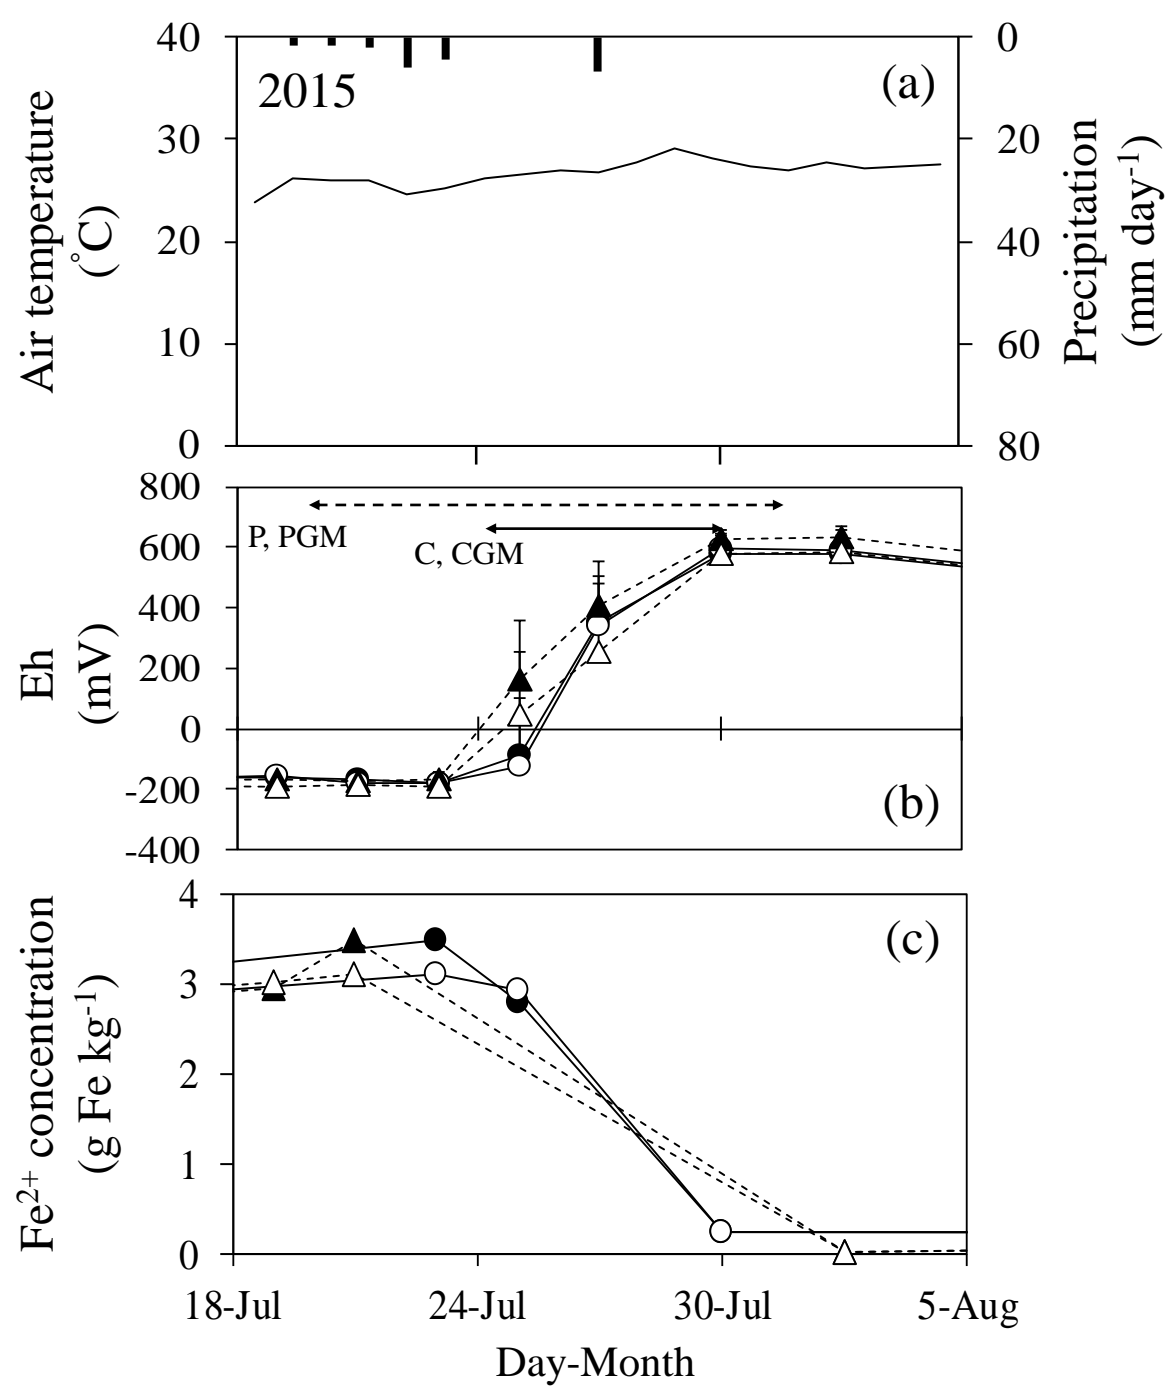

Figure S3. Seasonal variations in air temperature and precipitation (a), Eh (b), and Fe<sup>2+</sup> concentration (c) in the period of mid-season drainage in 2015. Error bars represent standard deviations. Arrows of the continuous and dotted lines show the periods of MD.
