# Supplementary material
Source: MDPI journal article supplement (https://www.mdpi.com/2077-0472/9/2/29)
Supplement: s1 [file s1]

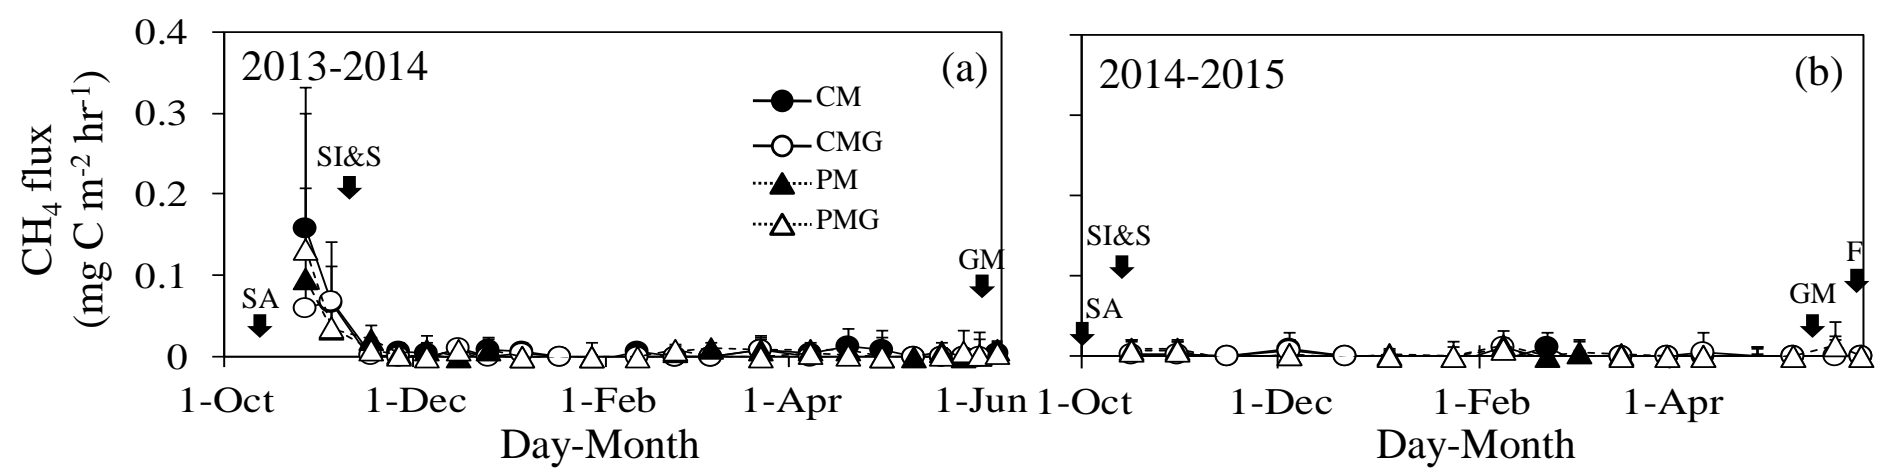

Figure S1. Seasonal variations in  $\text{CH}_4$  fluxes in fallow season in the first (a) and second (b) years. Error bars represent standard deviations. SA, SI, and S, GM, and F represent straw application, incorporation, seeding, green manure and weeds incorporations, and fertilization, respectively.
